# Supplementary material
Source: PubMed Central journal article supplement (PMC7671904)
Supplement: IAI.00545-20-s0001.pdf [file IAI.00545-20-s0001.pdf]

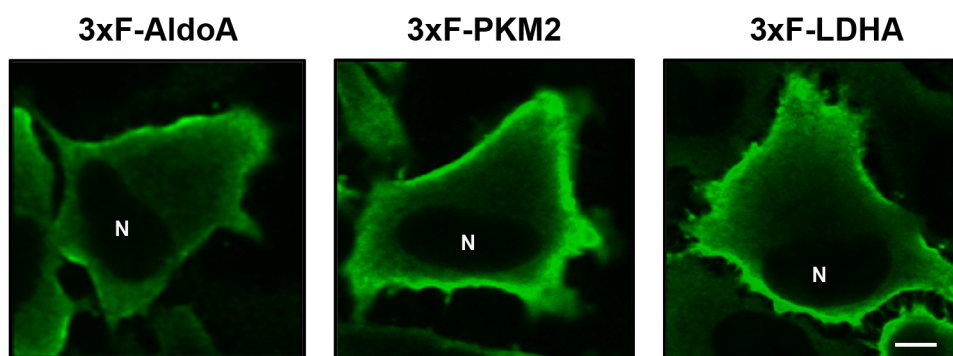

**Figure S1. Expression of tagged host glycolytic enzymes in uninfected cells.** Confocal micrographs of HeLa cells expressing 3xFLAG-tagged Aldolase A (AldoA), Pyruvate Kinase (PKM2), or Lactate Dehydrogenase (LDHA) (green). The cells were fixed at 42 h post transfection and stained with anti-FLAG antibodies. N: Nucleus. Scale bar: 10 $\mu$ m.

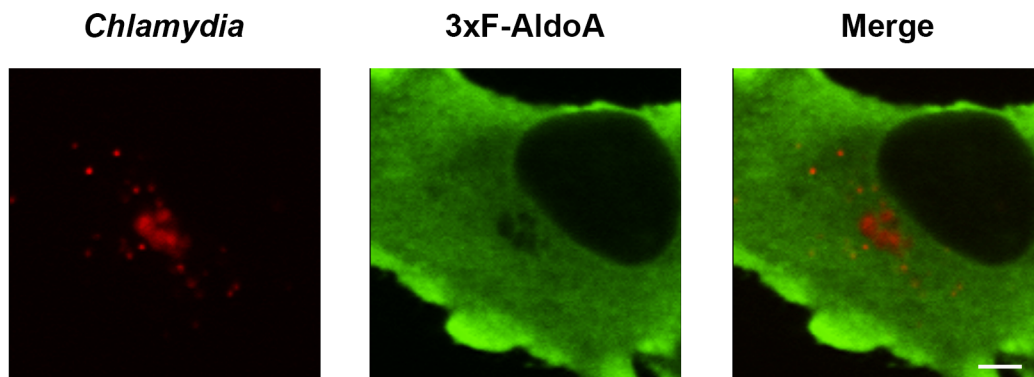

**Figure S2. Inclusions are negative for Aldolase A at 8 h post infection.** Confocal micrographs of HeLa cells expressing 3xFLAG-tagged Aldolase A (AldoA), infected for 8 h with the mCherry CtL2 strain (red), and immunostained with anti-FLAG antibodies (green). The merge is shown on the right. Scale bar: 10 $\mu$ m.

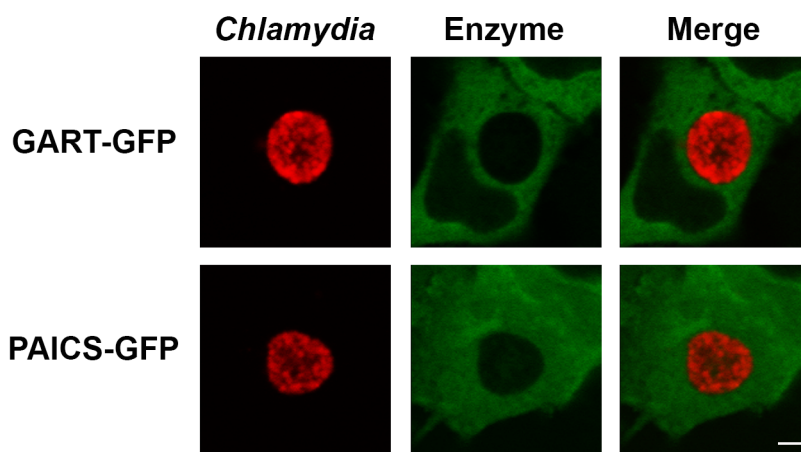

**Figure S3. GFP-tagged purine biosynthesis enzymes do not localize at the inclusion membrane.** Confocal micrographs of HeLa cells expressing GFP-tagged Glycinamide ribonucleotide transformylase (GART) or Phosphoribosylaminoimidazole carboxylase (PAICS) (green) and infected for 24 h with the mCherry CtL2 strain (red). The merge is shown on the right. Scale bar: 10 $\mu$ m.

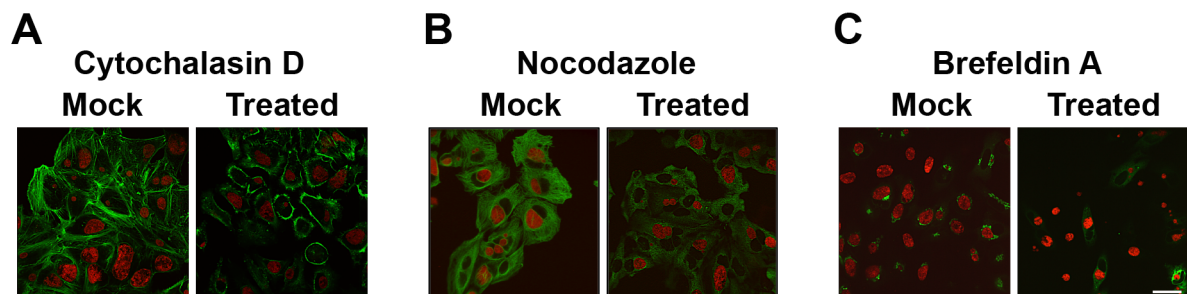

**Figure S4. Validation of Cytochalasin D, Brefeldin A, and Nocodazole drug treatments.**

(A) Confocal micrographs of HeLa cells infected with the mCherry CtL2 strain (red) and fixed at 24 h post infection following the absence (Mock, left panel) or presence of 1  $\mu$ M Cytochalasin D at 23.5 h post infection (Treated, right panel) and immunostained with Phalloidin (green). (B) Confocal micrographs of HeLa cells infected with the mCherry CtL2 strain (red) and fixed at 24 h post infection following the absence (Mock, left panel) or presence of 33  $\mu$ M Nocodazole at 23.5 h post infection (Treated, right panel) and immunostained with anti- $\alpha$ -tubulin antibodies (green). (C) Confocal micrographs of HeLa cells expressing YFP-Golgi (green), infected with the mCherry CtL2 strain (red), and fixed at 24 h post infection following the absence (Mock, left panel) or presence of 1  $\mu$ g/mL Brefeldin A at 6 h post infection (Treated, right panel). Scale bar: 20  $\mu$ m.

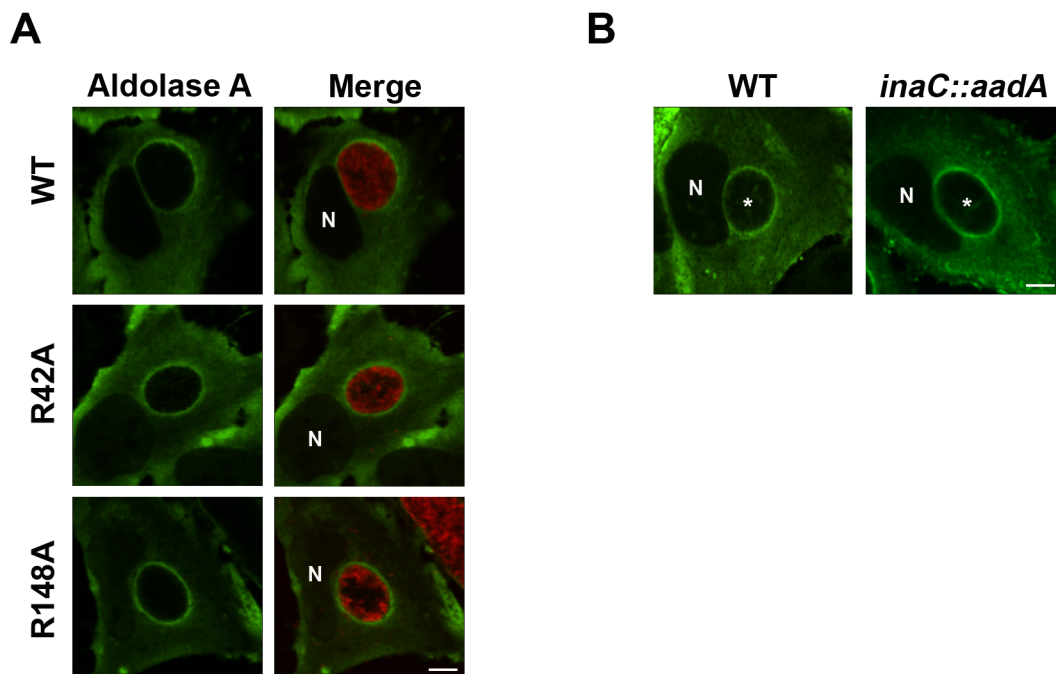

**Figure S5. Host actin does not affect localization of Aldolase A at the inclusion membrane.**

(A) Confocal micrographs of HeLa cells expressing wild-type 3xFLAG-AldoA (WT, top panels), or point mutants no longer able to bind actin 3xFLAG-R42A AldoA (R42A, middle panels) and 3xFLAG-R148A AldoA (R148A, bottom panels) (green), infected with the mCherry CtL2 strain (red) and fixed at 24 h post infection. (B) Confocal micrographs of HeLa cells expressing 3xFLAG-AldoA (green) and infected with wild-type *C. trachomatis* (WT, left panel) or an *inaC* mutant strain (*inaC::aadA*, right panel) that were fixed at 24 h post infection. The asterisk indicates the inclusion. N: Nucleus. Scale bar: 10 $\mu$ m.

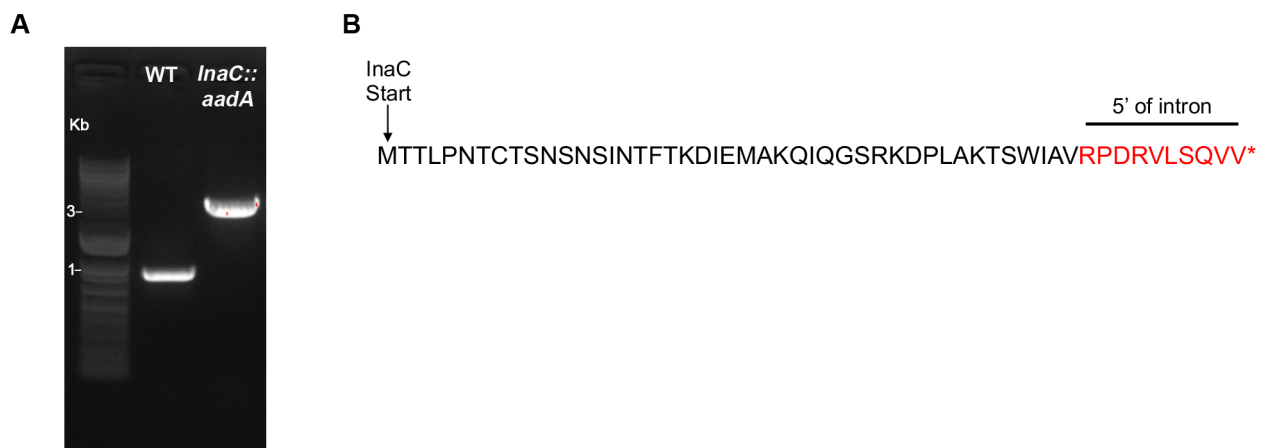

**Figure S6. Validation of group II intron insertion in the *C. trachomatis inaC::aadA* mutant.**

(A) PCR analysis of the *inaC::aadA* mutant. The *inaC* ORF was amplified from genomic DNA extracted from WT *C. trachomatis* (WT) or the *inaC::aadA* mutant and the corresponding PCR products were resolved on a 1% DNA agarose gel stained with ethidium bromide. Lane 1: molecular weight marker; lane 2: WT; lane 3: *inaC::aadA* mutant. The marker sizes are listed in kilo base pairs to the left. (B) The site of insertion of the group II intron was determined by Sanger sequencing. A translation of the resulting InaC truncated peptide is presented. The asterisk denotes the early stop codon introduced by insertion of the group II intron (black: InaC, red: group II intron).

**Table S1: Primers used in this study**

| <b>Primer Name</b>            | <b>Primer Sequence</b>                                   |
|-------------------------------|----------------------------------------------------------|
| AldoA Fwd BamHI               | GGAGGATCCATGCCCTACCAATATCCAGCACTG                        |
| AldoA Rev XhoI                | CTCCTCGAGTTAATAGGCGTGGTTAGAGAC                           |
| PKM2 Fwd BamHI                | GGAGGATCCATGTCTGAAGCCCCATAGTGAAGC                        |
| PKM2 Rev XhoI                 | CTCCTCGAGTCACGGCACAGGAACAACACG                           |
| LDHA Fwd EcoRI                | GAAGAATTCTATGGCAACTCTAAAGGATCAG                          |
| LDHA Rev XhoI                 | CTCCTCGAGTTAAAATTGCAGCTCCTTTTG                           |
| HAldoA 5 KpnI                 | GGTGGTACCATGTACCCTTACGATGTACCGGATTACGCAATGCCCTACCAATATCC |
| AldoA 3 NotI                  | GCGGCGGCCGCTTAATAGGCGTGGTTAGAGACG                        |
| R42A AldoA Fwd                | GAGCATTGCCAAGGCACTGCAGTCCATTGG                           |
| R42A AldoA Rev                | CCAATGGACTGCAGTGCCTTGGCAATGCTC                           |
| R148 AldoA Fwd                | CTTCGCCAAGTGGGCATGTGTGCTGAAG                             |
| R148 AldoA Rev                | CTTCAGCACACATGCCCACTTGGCGAAG                             |
| CTL0184 129 130<br>IBS1/2     | AAAAAAGCTTATAATTATCCTTATCATGCATCGCAGTGCGCCAGATAGGGTG     |
| CTL0184 129 130<br>EBS1/delta | CAGATTGTACAAATGTGGTGATAACAGATAAGTCATCGCAGGTAACCTTTCTTTGT |
| CTL0184 129 130<br>EBS2       | TGAACGCAAGTTTCTAATTTTCGATTCATGATCGATAGAGGAAAGTGTCT       |
| CTL0184 Up                    | GCAGAAATAGGTCTGAGGCTG                                    |
| CTL0184 Dwn                   | CAACGAATTAGACATTCGTC                                     |

**Table S2: Primers and probes used for quantitative PCR analysis**

| <b>Gene</b> | <b>Probe</b> | <b>Primer</b> | <b>Sequence</b>          |
|-------------|--------------|---------------|--------------------------|
| 16S rRNA    | #105         | Ct 16s Fwd    | gccgctaataccgaatgtg      |
|             |              | Ct 16s Rev    | aaggtcctaagatccccttctt   |
| <i>omcA</i> | #33          | CTL0703 Fwd   | cggtggtgcaactcttgta      |
|             |              | CTL0703 Rev   | tcagcatcttggtgcgtatc     |
| <i>pgi</i>  | #69          | CTL0633 Fwd   | gctgctgcatagcaagac       |
|             |              | CTL0633 Rev   | atacagaaactctgcaagacgaag |
| <i>dhnA</i> | #24          | CTL0467 Fwd   | ttcagtcaagttgaagatgccta  |
|             |              | CTL0467 Rev   | agtaaatcgttgctccgacag    |
| <i>pykF</i> | #159         | CTL0586 Fwd   | gataggccctgcaacgaata     |
|             |              | CTL0586 Rev   | cattcatccctgcatcgag      |
